# Supplementary material for: Probabilistic combination of classification rules and its application to medical diagnosis
Source: Springer Nature journal article supplement (doi:10.1007/s10994-015-5508-x), 2015-06-19
Supplement: MOESM1 [file 10994_2015_5508_MOESM1_ESM.pdf]

# Probabilistic combination of classification rules and its application to medical diagnosis

Electronic Supplementary Material

Jakub M. Tomczak, Maciej Zięba

Department of Computer Science, Wrocław University of Technology

Wybrzeże Wyspiańskiego 27, 50-370, Wrocław, Poland

{jakub.tomczak,maciej.zieba}@pwr.edu.pl

## Appendix: Detailed results of the experiments

Table A1: Detailed test results for **CSR** vs. the considered methods for *Gmean* on benchmark datasets.

| Dataset            | CSR   | AB    | BAG   | SBAG  | SBoost | CSVM  | C45   | NN    | NB    | RIPPER | IR    | CFAR  | SGERD | ART   |
|--------------------|-------|-------|-------|-------|--------|-------|-------|-------|-------|--------|-------|-------|-------|-------|
| abalone19          | 0.697 | 0.000 | 0.000 | 0.386 | 0.176  | 0.763 | 0.424 | 0.395 | 0.000 | 0.304  | 0.000 | 0.000 | 0.000 | 0.000 |
| abalone9-18        | 0.729 | 0.585 | 0.528 | 0.733 | 0.767  | 0.876 | 0.612 | 0.704 | 0.516 | 0.757  | 0.403 | 0.000 | 0.000 | 0.372 |
| car-2class         | 0.967 | 0.977 | 0.955 | 0.949 | 0.982  | 0.822 | 0.961 | 0.748 | 0.917 | 0.953  | 0.667 | 0.000 | 0.667 | 0.961 |
| ecoli-0-1-3-7vs2-6 | 0.842 | 0.844 | 0.653 | 0.825 | 0.833  | 0.845 | 0.826 | 0.721 | 0.653 | 0.830  | 0.000 | 0.844 | 0.841 | 0.647 |
| ecoli-0vs1         | 0.977 | 0.973 | 0.983 | 0.977 | 0.973  | 0.967 | 0.983 | 0.983 | 0.977 | 0.970  | 0.974 | 0.964 | 0.980 | 0.967 |
| ecoli1             | 0.897 | 0.835 | 0.824 | 0.901 | 0.894  | 0.903 | 0.911 | 0.824 | 0.857 | 0.878  | 0.829 | 0.702 | 0.360 | 0.844 |
| ecoli2             | 0.896 | 0.854 | 0.865 | 0.890 | 0.900  | 0.000 | 0.888 | 0.755 | 0.854 | 0.850  | 0.679 | 0.791 | 0.000 | 0.763 |
| ecoli3             | 0.851 | 0.756 | 0.759 | 0.872 | 0.844  | 0.789 | 0.830 | 0.689 | 0.839 | 0.827  | 0.689 | 0.000 | 0.000 | 0.528 |
| ecoli4             | 0.901 | 0.830 | 0.802 | 0.932 | 0.958  | 0.933 | 0.861 | 0.695 | 0.805 | 0.830  | 0.854 | 0.000 | 0.229 | 0.844 |
| glass-0123vs456    | 0.920 | 0.858 | 0.898 | 0.934 | 0.923  | 0.832 | 0.878 | 0.918 | 0.872 | 0.851  | 0.881 | 0.794 | 0.830 | 0.868 |
| glass-016vs5       | 0.941 | 0.877 | 0.874 | 0.856 | 0.927  | 0.000 | 0.989 | 0.888 | 0.899 | 0.735  | 0.000 | 0.000 | 0.000 | 0.929 |
| glass0             | 0.823 | 0.807 | 0.825 | 0.827 | 0.813  | 0.168 | 0.820 | 0.642 | 0.799 | 0.768  | 0.615 | 0.586 | 0.203 | 0.755 |
| glass1             | 0.651 | 0.782 | 0.728 | 0.748 | 0.794  | 0.601 | 0.714 | 0.586 | 0.644 | 0.726  | 0.682 | 0.634 | 0.160 | 0.539 |
| glass4             | 0.838 | 0.775 | 0.775 | 0.878 | 0.922  | 0.924 | 0.852 | 0.861 | 0.545 | 0.901  | 0.277 | 0.000 | 0.392 | 0.763 |
| glass5             | 0.947 | 0.941 | 0.813 | 0.858 | 0.980  | 0.973 | 0.936 | 0.858 | 0.908 | 0.873  | 0.000 | 0.000 | 0.000 | 0.573 |
| glass6             | 0.906 | 0.862 | 0.842 | 0.924 | 0.857  | 0.862 | 0.885 | 0.916 | 0.908 | 0.874  | 0.803 | 0.715 | 0.912 | 0.908 |
| haberman1mb        | 0.633 | 0.499 | 0.458 | 0.658 | 0.648  | 0.311 | 0.527 | 0.565 | 0.402 | 0.589  | 0.325 | 0.523 | 0.314 | 0.000 |
| iris0              | 1.000 | 0.990 | 0.980 | 0.980 | 0.990  | 1.000 | 0.990 | 1.000 | 1.000 | 0.980  | 1.000 | 1.000 | 0.995 | 0.990 |
| new-thyroid1       | 0.969 | 0.968 | 0.936 | 0.983 | 0.992  | 0.968 | 0.975 | 0.819 | 0.968 | 0.960  | 0.786 | 0.866 | 0.662 | 0.905 |
| new-thyroid2       | 0.989 | 0.951 | 0.918 | 0.966 | 0.963  | 0.983 | 0.980 | 0.881 | 0.941 | 0.936  | 0.802 | 0.879 | 0.737 | 0.936 |
| page-blocks-1-3vs4 | 0.981 | 0.961 | 0.998 | 0.988 | 0.995  | 0.842 | 0.981 | 0.923 | 0.955 | 0.980  | 0.626 | 0.460 | 0.471 | 0.980 |
| page-blocks0       | 0.905 | 0.927 | 0.922 | 0.956 | 0.935  | 0.925 | 0.945 | 0.699 | 0.894 | 0.931  | 0.594 | 0.042 | 0.446 | 0.701 |
| pima1mb            | 0.725 | 0.672 | 0.691 | 0.717 | 0.726  | 0.724 | 0.712 | 0.731 | 0.682 | 0.709  | 0.611 | 0.527 | 0.578 | 0.000 |
| shuttle-c0-vs-c4   | 1.000 | 1.000 | 1.000 | 1.000 | 1.000  | 1.000 | 1.000 | 0.830 | 1.000 | 1.000  | 1.000 | 0.128 | 1.000 | 0.996 |
| shuttle-c2-vs-c4   | 1.000 | 0.913 | 0.816 | 1.000 | 1.000  | 1.000 | 1.000 | 0.883 | 1.000 | 0.913  | 0.000 | 0.000 | 0.408 | 0.988 |
| vowel0             | 0.913 | 0.970 | 0.964 | 0.982 | 0.990  | 0.833 | 0.942 | 0.750 | 0.885 | 0.915  | 0.726 | 0.000 | 0.740 | 0.841 |
| wisconsin1mb       | 0.976 | 0.966 | 0.958 | 0.972 | 0.965  | 0.972 | 0.964 | 0.962 | 0.974 | 0.960  | 0.000 | 0.960 | 0.923 | 0.947 |
| yeast-05679vs4     | 0.782 | 0.645 | 0.620 | 0.820 | 0.773  | 0.000 | 0.703 | 0.681 | 0.411 | 0.769  | 0.518 | 0.000 | 0.244 | 0.242 |
| yeast-1289vs7      | 0.481 | 0.446 | 0.315 | 0.577 | 0.567  | 0.000 | 0.632 | 0.433 | 0.407 | 0.639  | 0.000 | 0.000 | 0.000 | 0.181 |
| yeast-1vs7         | 0.620 | 0.512 | 0.445 | 0.675 | 0.661  | 0.000 | 0.528 | 0.528 | 0.364 | 0.718  | 0.000 | 0.000 | 0.183 | 0.000 |
| yeast-2vs4         | 0.925 | 0.842 | 0.841 | 0.897 | 0.896  | 0.000 | 0.887 | 0.396 | 0.856 | 0.876  | 0.721 | 0.000 | 0.399 | 0.701 |
| yeast-2vs8         | 0.741 | 0.670 | 0.000 | 0.817 | 0.733  | 0.735 | 0.838 | 0.672 | 0.741 | 0.725  | 0.000 | 0.741 | 0.741 | 0.516 |
| yeast1             | 0.686 | 0.618 | 0.675 | 0.701 | 0.720  | 0.669 | 0.667 | 0.645 | 0.641 | 0.690  | 0.410 | 0.558 | 0.244 | 0.000 |
| yeast3             | 0.909 | 0.786 | 0.861 | 0.933 | 0.873  | 0.895 | 0.911 | 0.661 | 0.845 | 0.890  | 0.650 | 0.078 | 0.348 | 0.884 |
| yeast4             | 0.839 | 0.501 | 0.484 | 0.794 | 0.673  | 0.814 | 0.689 | 0.668 | 0.532 | 0.655  | 0.000 | 0.000 | 0.000 | 0.000 |
| yeast5             | 0.938 | 0.837 | 0.850 | 0.986 | 0.921  | 0.965 | 0.932 | 0.690 | 0.916 | 0.873  | 0.151 | 0.000 | 0.000 | 0.000 |
| yeast6             | 0.871 | 0.714 | 0.715 | 0.826 | 0.783  | 0.876 | 0.794 | 0.566 | 0.824 | 0.728  | 0.000 | 0.000 | 0.000 | 0.629 |
| Mean               | 0.856 | 0.782 | 0.745 | 0.857 | 0.847  | 0.697 | 0.837 | 0.740 | 0.763 | 0.821  | 0.467 | 0.346 | 0.406 | 0.608 |
| Std. Dev.          | 0.128 | 0.205 | 0.248 | 0.135 | 0.163  | 0.355 | 0.152 | 0.149 | 0.230 | 0.139  | 0.357 | 0.384 | 0.346 | 0.365 |

Table A2: Detailed test results for **CSR** vs. the considered methods for  $Gmean$  on medical datasets.

| Dataset                | CSR          | AB           | BAG          | SBAG         | SBoost       | CSVM         | C45          | NN           | NB           | RIPPER       | IR           | CFAR         | SGERD        | ART          |
|------------------------|--------------|--------------|--------------|--------------|--------------|--------------|--------------|--------------|--------------|--------------|--------------|--------------|--------------|--------------|
| breast cancer          | 0.670        | 0.425        | 0.439        | 0.399        | 0.543        | 0.565        | 0.459        | 0.617        | 0.620        | 0.603        | 0.390        | 0.000        | 0.543        | 0.000        |
| breast wisconsin       | 0.949        | 0.951        | 0.947        | 0.958        | 0.960        | 0.960        | 0.929        | 0.941        | 0.973        | 0.939        | 0.912        | 0.765        | 0.935        | 0.935        |
| diabetes               | 0.764        | 0.687        | 0.708        | 0.743        | 0.737        | 0.747        | 0.732        | 0.668        | 0.742        | 0.740        | 0.603        | 0.220        | 0.627        | 0.537        |
| hepatitis              | 0.871        | 0.809        | 0.725        | 0.769        | 0.773        | 0.705        | 0.739        | 0.836        | 0.819        | 0.740        | 0.519        | 0.708        | 0.639        | 0.761        |
| indian liver           | 0.697        | 0.549        | 0.541        | 0.703        | 0.709        | 0.328        | 0.663        | 0.673        | 0.702        | 0.674        | 0.190        | 0.000        | 0.174        | 0.000        |
| liver disorders        | 0.392        | 0.585        | 0.555        | 0.554        | 0.579        | 0.726        | 0.542        | 0.472        | 0.579        | 0.573        | 0.578        | 0.331        | 0.482        | 0.000        |
| post operative patient | 0.469        | 0.266        | 0.196        | 0.486        | 0.318        | 0.199        | 0.312        | 0.431        | 0.280        | 0.410        | 0.639        | 0.452        | 0.680        | 0.000        |
| oncology               | 0.675        | 0.649        | 0.653        | 0.678        | 0.692        | 0.662        | 0.680        | 0.669        | 0.677        | 0.440        | 0.000        | 0.000        | 0.211        | 0.000        |
| Mean                   | <b>0.711</b> | <b>0.615</b> | <b>0.596</b> | <b>0.686</b> | <b>0.664</b> | <b>0.612</b> | <b>0.632</b> | <b>0.664</b> | <b>0.674</b> | <b>0.640</b> | <b>0.479</b> | <b>0.309</b> | <b>0.536</b> | <b>0.279</b> |
| Std. Dev.              | 0.152        | 0.214        | 0.222        | 0.146        | 0.189        | 0.244        | 0.190        | 0.169        | 0.201        | 0.173        | 0.283        | 0.312        | 0.250        | 0.400        |

Table A3: Detailed test results for **CSR** vs. the considered methods for  $AUC$  on benchmark datasets.

| Dataset              | CSR          | AB           | BAG          | SBAG         | SBoost       | CSVM         | C45          | NN           | NB           | RIPPER       | IR           | CFAR         | SGERD        | ART          |
|----------------------|--------------|--------------|--------------|--------------|--------------|--------------|--------------|--------------|--------------|--------------|--------------|--------------|--------------|--------------|
| abalone0             | 0.715        | 0.499        | 0.590        | 0.554        | 0.599        | 0.763        | 0.573        | 0.412        | 0.590        | 0.540        | 0.500        | 0.500        | 0.500        | 0.499        |
| abalone9-18          | 0.737        | 0.665        | 0.640        | 0.747        | 0.782        | 0.876        | 0.672        | 0.714        | 0.616        | 0.776        | 0.579        | 0.500        | 0.500        | 0.565        |
| car-2class           | 0.967        | 0.977        | 0.955        | 0.949        | 0.982        | 0.826        | 0.962        | 0.768        | 0.918        | 0.953        | 0.674        | 0.500        | 0.674        | 0.961        |
| ecoli-0-1-3-7vs2-6   | 0.853        | 0.855        | 0.712        | 0.833        | 0.843        | 0.857        | 0.835        | 0.731        | 0.712        | 0.859        | 0.500        | 0.855        | 0.852        | 0.703        |
| ecoli-0vs1           | 0.977        | 0.973        | 0.984        | 0.977        | 0.973        | 0.968        | 0.984        | 0.984        | 0.977        | 0.970        | 0.974        | 0.964        | 0.980        | 0.967        |
| ecoli1               | 0.899        | 0.840        | 0.831        | 0.902        | 0.895        | 0.906        | 0.911        | 0.834        | 0.857        | 0.878        | 0.829        | 0.730        | 0.558        | 0.846        |
| ecoli2               | 0.897        | 0.861        | 0.871        | 0.891        | 0.902        | 0.500        | 0.889        | 0.781        | 0.858        | 0.855        | 0.711        | 0.806        | 0.496        | 0.781        |
| ecoli3               | 0.851        | 0.777        | 0.780        | 0.872        | 0.848        | 0.792        | 0.833        | 0.693        | 0.840        | 0.832        | 0.731        | 0.500        | 0.495        | 0.631        |
| ecoli4               | 0.903        | 0.842        | 0.820        | 0.933        | 0.958        | 0.953        | 0.864        | 0.695        | 0.823        | 0.842        | 0.861        | 0.498        | 0.526        | 0.830        |
| glass-0123vs456      | 0.920        | 0.864        | 0.900        | 0.934        | 0.923        | 0.844        | 0.879        | 0.918        | 0.877        | 0.853        | 0.882        | 0.811        | 0.837        | 0.869        |
| glass-010vs5         | 0.943        | 0.883        | 0.880        | 0.860        | 0.927        | 0.500        | 0.989        | 0.894        | 0.899        | 0.763        | 0.500        | 0.500        | 0.500        | 0.930        |
| glass0               | 0.833        | 0.809        | 0.827        | 0.828        | 0.813        | 0.507        | 0.821        | 0.687        | 0.799        | 0.768        | 0.655        | 0.593        | 0.504        | 0.756        |
| glass1               | 0.674        | 0.787        | 0.741        | 0.752        | 0.796        | 0.626        | 0.715        | 0.595        | 0.675        | 0.726        | 0.705        | 0.661        | 0.491        | 0.579        |
| glass4               | 0.842        | 0.795        | 0.795        | 0.878        | 0.922        | 0.924        | 0.855        | 0.871        | 0.636        | 0.903        | 0.538        | 0.498        | 0.577        | 0.780        |
| glass5               | 0.949        | 0.942        | 0.828        | 0.862        | 0.980        | 0.973        | 0.937        | 0.868        | 0.908        | 0.879        | 0.500        | 0.498        | 0.500        | 0.639        |
| glass6               | 0.907        | 0.868        | 0.851        | 0.924        | 0.863        | 0.868        | 0.887        | 0.916        | 0.909        | 0.878        | 0.819        | 0.733        | 0.915        | 0.909        |
| haberman1mb          | 0.646        | 0.580        | 0.564        | 0.663        | 0.648        | 0.540        | 0.575        | 0.577        | 0.533        | 0.626        | 0.531        | 0.564        | 0.537        | 0.500        |
| iris0                | 1.000        | 0.990        | 0.980        | 0.980        | 0.990        | 1.000        | 0.990        | 1.000        | 1.000        | 0.980        | 1.000        | 1.000        | 0.995        | 0.990        |
| new-thyroid1         | 0.969        | 0.969        | 0.937        | 0.983        | 0.992        | 0.969        | 0.975        | 0.820        | 0.969        | 0.960        | 0.806        | 0.872        | 0.718        | 0.909        |
| new-thyroid2         | 0.989        | 0.952        | 0.920        | 0.966        | 0.963        | 0.983        | 0.980        | 0.881        | 0.943        | 0.957        | 0.812        | 0.883        | 0.771        | 0.937        |
| page-blocks-1-3 vs 4 | 0.981        | 0.992        | 0.998        | 0.988        | 0.995        | 0.854        | 0.981        | 0.920        | 0.956        | 0.980        | 0.695        | 0.600        | 0.611        | 0.980        |
| page-block0          | 0.905        | 0.920        | 0.925        | 0.956        | 0.936        | 0.925        | 0.946        | 0.701        | 0.895        | 0.932        | 0.672        | 0.501        | 0.509        | 0.744        |
| pima1mb              | 0.725        | 0.686        | 0.701        | 0.719        | 0.727        | 0.729        | 0.713        | 0.734        | 0.690        | 0.710        | 0.655        | 0.614        | 0.643        | 0.500        |
| shuttle-c0-vs-c4     | 1.000        | 1.000        | 1.000        | 1.000        | 1.000        | 1.000        | 1.000        | 0.830        | 1.000        | 1.000        | 1.000        | 0.508        | 1.000        | 0.996        |
| shuttle-c2-vs-c4     | 1.000        | 0.917        | 0.833        | 1.000        | 1.000        | 1.000        | 1.000        | 0.890        | 1.000        | 0.917        | 0.500        | 0.496        | 0.583        | 0.988        |
| vowel0               | 0.914        | 0.971        | 0.964        | 0.982        | 0.990        | 0.846        | 0.942        | 0.764        | 0.890        | 0.918        | 0.761        | 0.500        | 0.771        | 0.851        |
| wisconsin1mb         | 0.976        | 0.966        | 0.958        | 0.972        | 0.965        | 0.972        | 0.964        | 0.962        | 0.974        | 0.960        | 0.500        | 0.960        | 0.925        | 0.948        |
| yeast-05679 vs 4     | 0.786        | 0.698        | 0.687        | 0.822        | 0.785        | 0.500        | 0.724        | 0.708        | 0.567        | 0.781        | 0.627        | 0.500        | 0.528        | 0.525        |
| yeast-1289vs7        | 0.613        | 0.596        | 0.547        | 0.637        | 0.649        | 0.500        | 0.677        | 0.435        | 0.580        | 0.688        | 0.500        | 0.500        | 0.500        | 0.507        |
| yeast-1vs7           | 0.635        | 0.625        | 0.594        | 0.694        | 0.702        | 0.500        | 0.614        | 0.532        | 0.564        | 0.738        | 0.499        | 0.499        | 0.517        | 0.498        |
| yeast-2vs4           | 0.925        | 0.851        | 0.850        | 0.897        | 0.898        | 0.500        | 0.888        | 0.598        | 0.864        | 0.879        | 0.756        | 0.499        | 0.578        | 0.737        |
| yeast-2vs8           | 0.774        | 0.724        | 0.500        | 0.827        | 0.763        | 0.766        | 0.865        | 0.682        | 0.774        | 0.753        | 0.500        | 0.774        | 0.774        | 0.548        |
| yeast1               | 0.698        | 0.647        | 0.701        | 0.707        | 0.723        | 0.675        | 0.678        | 0.653        | 0.676        | 0.690        | 0.568        | 0.588        | 0.520        | 0.500        |
| yeast3               | 0.909        | 0.803        | 0.867        | 0.933        | 0.877        | 0.895        | 0.912        | 0.696        | 0.854        | 0.891        | 0.703        | 0.503        | 0.553        | 0.886        |
| yeast4               | 0.839        | 0.620        | 0.616        | 0.803        | 0.716        | 0.816        | 0.721        | 0.690        | 0.629        | 0.702        | 0.500        | 0.500        | 0.500        | 0.500        |
| yeast5               | 0.938        | 0.849        | 0.861        | 0.986        | 0.923        | 0.966        | 0.933        | 0.712        | 0.918        | 0.879        | 0.510        | 0.500        | 0.500        | 0.500        |
| yeast6               | 0.871        | 0.733        | 0.755        | 0.834        | 0.802        | 0.876        | 0.808        | 0.567        | 0.833        | 0.759        | 0.500        | 0.500        | 0.500        | 0.695        |
| Mean                 | <b>0.864</b> | <b>0.820</b> | <b>0.802</b> | <b>0.866</b> | <b>0.864</b> | <b>0.797</b> | <b>0.851</b> | <b>0.749</b> | <b>0.809</b> | <b>0.836</b> | <b>0.664</b> | <b>0.622</b> | <b>0.636</b> | <b>0.744</b> |
| Std. Dev.            | 0.114        | 0.135        | 0.145        | 0.115        | 0.122        | 0.178        | 0.128        | 0.146        | 0.149        | 0.111        | 0.158        | 0.166        | 0.167        | 0.184        |

Table A4: Detailed test results for **CSR** vs. considered methods for  $AUC$  on medical datasets.

| Dataset                | CSR          | AB           | BAG          | SBAG         | SBoost       | CSVM         | C45          | NN           | NB           | RIPPER       | IR           | CFAR         | SGERD        | ART          |
|------------------------|--------------|--------------|--------------|--------------|--------------|--------------|--------------|--------------|--------------|--------------|--------------|--------------|--------------|--------------|
| breast cancer          | 0.670        | 0.489        | 0.561        | 0.616        | 0.568        | 0.620        | 0.532        | 0.618        | 0.654        | 0.605        | 0.519        | 0.500        | 0.629        | 0.500        |
| breast wisconsin       | 0.949        | 0.952        | 0.947        | 0.958        | 0.960        | 0.960        | 0.929        | 0.941        | 0.973        | 0.939        | 0.912        | 0.791        | 0.936        | 0.936        |
| diabetes               | 0.765        | 0.696        | 0.720        | 0.745        | 0.737        | 0.757        | 0.732        | 0.678        | 0.744        | 0.740        | 0.657        | 0.522        | 0.681        | 0.582        |
| hepatitis              | 0.872        | 0.815        | 0.749        | 0.769        | 0.783        | 0.733        | 0.740        | 0.837        | 0.822        | 0.742        | 0.620        | 0.737        | 0.694        | 0.776        |
| indian liver           | 0.701        | 0.595        | 0.594        | 0.705        | 0.710        | 0.530        | 0.681        | 0.678        | 0.702        | 0.688        | 0.518        | 0.500        | 0.494        | 0.500        |
| liver disorders        | 0.393        | 0.592        | 0.579        | 0.554        | 0.581        | 0.728        | 0.556        | 0.481        | 0.587        | 0.573        | 0.608        | 0.533        | 0.551        | 0.500        |
| pos toperative patient | 0.564        | 0.466        | 0.483        | 0.487        | 0.347        | 0.498        | 0.335        | 0.451        | 0.511        | 0.547        | 0.677        | 0.568        | 0.701        | 0.500        |
| oncology               | 0.701        | 0.677        | 0.685        | 0.692        | 0.698        | 0.672        | 0.681        | 0.671        | 0.698        | 0.445        | 0.500        | 0.500        | 0.493        | 0.439        |
| Mean                   | <b>0.727</b> | <b>0.660</b> | <b>0.665</b> | <b>0.691</b> | <b>0.673</b> | <b>0.687</b> | <b>0.648</b> | <b>0.669</b> | <b>0.712</b> | <b>0.660</b> | <b>0.626</b> | <b>0.582</b> | <b>0.647</b> | <b>0.592</b> |
| Std. Dev.              | 0.131        | 0.163        | 0.145        | 0.145        | 0.180        | 0.145        | 0.176        | 0.164        | 0.142        | 0.152        | 0.134        | 0.116        | 0.145        | 0.173        |

Table A5: Detailed test results for **CSR** vs. considered methods for *Precision* (in table denoted by **P**) and *Recall* (in table denoted by **R**) on benchmark datasets.

| Dataset              | CSR   |       | AB    |       | BAG   |       | SBAG  |       | SBoost |       | CSVM  |       | C45   |       | NN    |       | NB    |       | RIPPER |       | IR    |       | CFAR  |       | SGERD |       | ART   |       |       |
|----------------------|-------|-------|-------|-------|-------|-------|-------|-------|--------|-------|-------|-------|-------|-------|-------|-------|-------|-------|--------|-------|-------|-------|-------|-------|-------|-------|-------|-------|-------|
|                      | P     | R     | P     | R     | P     | R     | P     | R     | P      | R     | P     | R     | P     | R     | P     | R     | P     | R     | P      | R     | P     | R     | P     | R     | P     | R     | P     | R     |       |
| abalone19            | 0.015 | 0.875 | 0.000 | 0.000 | 0.000 | 0.000 | 0.025 | 0.156 | 0.017  | 0.031 | 0.025 | 0.750 | 0.034 | 0.188 | 0.006 | 0.531 | 0.000 | 0.052 | 0.094  | 0.000 | 0.000 | 0.000 | 0.000 | 0.000 | 0.000 | 0.000 | 0.000 | 0.000 | 0.000 |
| abalone9-18          | 0.203 | 0.628 | 0.536 | 0.349 | 1.000 | 0.279 | 0.255 | 0.605 | 0.380  | 0.628 | 0.333 | 0.860 | 0.321 | 0.395 | 0.114 | 0.837 | 0.273 | 0.279 | 0.419  | 0.605 | 0.700 | 0.163 | 0.000 | 0.000 | 0.000 | 0.000 | 0.000 | 0.500 | 0.140 |
| car-2class           | 0.995 | 0.945 | 0.965 | 0.969 | 0.900 | 0.956 | 0.831 | 0.985 | 0.948  | 0.986 | 0.782 | 0.741 | 0.854 | 0.996 | 0.497 | 0.946 | 0.906 | 0.875 | 0.862  | 0.973 | 0.519 | 0.577 | 0.000 | 0.000 | 0.000 | 0.519 | 0.577 | 0.868 | 0.986 |
| ecoli-0-1-3-7vs-2-6  | 0.714 | 0.714 | 0.833 | 0.714 | 0.750 | 0.429 | 0.278 | 0.714 | 0.385  | 0.714 | 1.000 | 0.714 | 0.294 | 0.714 | 0.053 | 0.857 | 0.750 | 0.429 | 0.333  | 0.714 | 0.000 | 0.000 | 0.833 | 0.714 | 0.625 | 0.714 | 0.333 | 0.429 |       |
| ecoli-0vs-1          | 0.987 | 0.961 | 0.949 | 0.974 | 0.987 | 0.974 | 0.962 | 0.974 | 0.949  | 0.974 | 1.000 | 0.935 | 0.987 | 0.974 | 0.987 | 0.974 | 0.987 | 0.961 | 0.938  | 0.974 | 1.000 | 0.948 | 0.986 | 0.935 | 1.000 | 0.961 | 0.949 | 0.961 |       |
| ecoli1               | 0.638 | 0.961 | 0.753 | 0.753 | 0.767 | 0.727 | 0.679 | 0.935 | 0.761  | 0.870 | 0.641 | 0.974 | 0.732 | 0.922 | 0.493 | 0.961 | 0.641 | 0.857 | 0.717  | 0.857 | 0.620 | 0.805 | 0.683 | 0.532 | 0.714 | 0.132 | 0.566 | 0.896 |       |
| ecoli2               | 0.639 | 0.885 | 0.830 | 0.750 | 0.833 | 0.769 | 0.710 | 0.846 | 0.786  | 0.846 | 0.000 | 0.000 | 0.643 | 0.865 | 0.300 | 0.981 | 0.727 | 0.769 | 0.702  | 0.769 | 0.542 | 0.500 | 0.739 | 0.654 | 0.000 | 0.000 | 0.681 | 0.615 |       |
| ecoli3               | 0.433 | 0.829 | 0.600 | 0.600 | 0.636 | 0.600 | 0.469 | 0.857 | 0.540  | 0.771 | 0.391 | 0.714 | 0.458 | 0.771 | 0.189 | 0.771 | 0.438 | 0.800 | 0.520  | 0.743 | 0.708 | 0.486 | 0.000 | 0.000 | 0.000 | 0.000 | 0.588 | 0.286 |       |
| ecoli4               | 0.548 | 0.850 | 0.737 | 0.700 | 0.813 | 0.650 | 0.621 | 0.900 | 0.633  | 0.950 | 0.576 | 0.950 | 0.410 | 0.800 | 0.125 | 0.700 | 0.929 | 0.650 | 0.737  | 0.700 | 0.625 | 0.750 | 0.000 | 0.000 | 1.000 | 0.000 | 0.553 | 0.484 | 0.750 |
| glass-0123vs456      | 0.821 | 0.902 | 0.867 | 0.765 | 0.860 | 0.843 | 0.800 | 0.941 | 0.836  | 0.902 | 0.923 | 0.706 | 0.754 | 0.843 | 0.770 | 0.922 | 0.889 | 0.784 | 0.719  | 0.804 | 0.768 | 0.843 | 0.892 | 0.647 | 0.795 | 0.729 | 0.750 | 0.824 |       |
| glass-01vs5          | 0.510 | 1.000 | 0.778 | 0.778 | 0.700 | 0.778 | 0.412 | 0.778 | 0.571  | 0.889 | 0.000 | 0.000 | 0.692 | 1.000 | 0.196 | 1.000 | 0.333 | 0.889 | 0.500  | 0.556 | 0.000 | 0.000 | 0.000 | 0.000 | 0.000 | 0.000 | 0.615 | 0.889 |       |
| glass0               | 0.615 | 0.957 | 0.726 | 0.757 | 0.761 | 0.771 | 0.663 | 0.871 | 0.705  | 0.786 | 0.500 | 0.029 | 0.649 | 0.871 | 0.448 | 0.929 | 0.659 | 0.800 | 0.614  | 0.771 | 0.658 | 0.429 | 0.400 | 0.686 | 0.375 | 0.043 | 0.633 | 0.714 |       |
| glass1               | 0.644 | 0.500 | 0.757 | 0.697 | 0.730 | 0.605 | 0.689 | 0.671 | 0.737  | 0.737 | 0.445 | 0.803 | 0.589 | 0.697 | 0.441 | 0.697 | 0.679 | 0.474 | 0.582  | 0.750 | 0.714 | 0.326 | 0.632 | 0.474 | 0.250 | 0.027 | 0.491 | 0.368 |       |
| glass4               | 0.200 | 0.923 | 0.615 | 0.615 | 0.615 | 0.615 | 0.379 | 0.846 | 0.429  | 0.923 | 0.444 | 0.923 | 0.218 | 0.923 | 0.200 | 1.000 | 0.364 | 0.308 | 0.579  | 0.846 | 1.000 | 0.077 | 0.000 | 0.000 | 1.000 | 0.154 | 0.421 | 0.615 |       |
| glass5               | 0.300 | 1.000 | 0.889 | 0.889 | 0.750 | 0.667 | 0.389 | 0.778 | 0.529  | 1.000 | 0.450 | 1.000 | 0.727 | 0.889 | 0.143 | 1.000 | 0.348 | 0.889 | 0.636  | 0.778 | 0.000 | 0.000 | 0.000 | 0.000 | 0.000 | 0.500 | 0.333 | 0.862 |       |
| glass6               | 0.735 | 0.862 | 0.846 | 0.759 | 0.840 | 0.724 | 0.743 | 0.897 | 0.786  | 0.759 | 0.846 | 0.759 | 0.706 | 0.828 | 0.684 | 0.897 | 0.758 | 0.862 | 0.767  | 0.793 | 0.864 | 0.655 | 0.882 | 0.517 | 0.880 | 0.846 | 0.758 | 0.862 |       |
| haberman1nb          | 0.452 | 0.519 | 0.451 | 0.284 | 0.442 | 0.235 | 0.452 | 0.580 | 0.405  | 0.630 | 0.667 | 0.099 | 0.307 | 0.802 | 0.352 | 0.457 | 0.483 | 0.173 | 0.340  | 0.840 | 0.450 | 0.111 | 0.301 | 0.778 | 0.571 | 0.101 | 0.000 | 0.000 |       |
| iris0                | 1.000 | 1.000 | 1.000 | 0.980 | 1.000 | 0.960 | 1.000 | 0.960 | 1.000  | 0.980 | 1.000 | 1.000 | 1.000 | 0.980 | 1.000 | 1.000 | 1.000 | 1.000 | 1.000  | 0.960 | 1.000 | 1.000 | 1.000 | 1.000 | 1.000 | 0.980 | 1.000 | 0.962 | 1.000 |
| new-thyroid1         | 0.850 | 0.971 | 0.971 | 0.943 | 0.939 | 0.886 | 0.854 | 1.000 | 0.921  | 1.000 | 0.971 | 0.943 | 0.895 | 0.971 | 0.435 | 0.857 | 0.971 | 0.943 | 0.892  | 0.943 | 0.880 | 0.629 | 0.844 | 0.771 | 0.938 | 0.441 | 0.935 | 0.829 |       |
| new-thyroid2         | 0.897 | 1.000 | 0.941 | 0.914 | 0.909 | 0.857 | 0.829 | 0.971 | 0.810  | 0.971 | 0.971 | 0.971 | 0.944 | 0.971 | 0.638 | 0.857 | 1.000 | 0.886 | 0.939  | 0.886 | 0.686 | 0.686 | 0.824 | 0.800 | 1.000 | 0.543 | 0.939 | 0.886 |       |
| page-blocks-1-3_vs_4 | 0.622 | 1.000 | 0.929 | 0.929 | 0.933 | 1.000 | 0.718 | 1.000 | 0.875  | 1.000 | 0.870 | 0.714 | 0.964 | 0.964 | 0.413 | 0.929 | 0.418 | 1.000 | 0.931  | 0.964 | 0.917 | 0.393 | 0.500 | 0.214 | 1.000 | 0.222 | 0.931 | 0.964 |       |
| page-blocks0         | 0.553 | 0.893 | 0.871 | 0.873 | 0.897 | 0.860 | 0.694 | 0.961 | 0.735  | 0.909 | 0.538 | 0.943 | 0.779 | 0.921 | 0.230 | 0.649 | 0.624 | 0.848 | 0.793  | 0.891 | 0.738 | 0.358 | 1.000 | 0.002 | 0.933 | 0.199 | 0.891 | 0.496 |       |
| pin1nb               | 0.586 | 0.724 | 0.629 | 0.545 | 0.634 | 0.582 | 0.606 | 0.672 | 0.611  | 0.690 | 0.648 | 0.646 | 0.560 | 0.755 | 0.565 | 0.799 | 0.607 | 0.582 | 0.551  | 0.746 | 0.675 | 0.418 | 0.696 | 0.299 | 0.722 | 0.361 | 0.000 | 0.000 |       |
| shuttle-c0-vs-c4     | 1.000 | 1.000 | 0.992 | 1.000 | 0.992 | 1.000 | 0.992 | 1.000 | 1.000  | 1.000 | 1.000 | 1.000 | 0.992 | 1.000 | 0.287 | 0.805 | 1.000 | 1.000 | 0.992  | 1.000 | 1.000 | 1.000 | 0.016 | 1.000 | 1.000 | 1.000 | 0.992 | 1.000 | 0.992 |
| shuttle-c2-vs-c4     | 1.000 | 1.000 | 1.000 | 0.833 | 1.000 | 0.667 | 1.000 | 1.000 | 1.000  | 1.000 | 1.000 | 1.000 | 1.000 | 1.000 | 0.182 | 1.000 | 1.000 | 1.000 | 1.000  | 0.833 | 0.000 | 0.000 | 0.000 | 0.000 | 1.000 | 0.167 | 0.667 | 1.000 |       |
| vowel0               | 0.690 | 0.867 | 0.966 | 0.944 | 0.955 | 0.933 | 0.880 | 0.978 | 0.918  | 0.989 | 0.900 | 0.700 | 0.774 | 0.911 | 0.192 | 0.911 | 0.800 | 0.800 | 0.916  | 0.844 | 0.814 | 0.533 | 0.000 | 0.000 | 0.806 | 0.556 | 0.783 | 0.722 |       |
| wisconsin1nb         | 0.951 | 0.979 | 0.950 | 0.958 | 0.938 | 0.950 | 0.943 | 0.975 | 0.943  | 0.962 | 0.951 | 0.971 | 0.911 | 0.979 | 0.946 | 0.954 | 0.944 | 0.979 | 0.907  | 0.975 | 0.000 | 0.000 | 0.954 | 0.946 | 0.957 | 0.870 | 0.937 | 0.929 |       |
| yeast-05679vs4       | 0.360 | 0.706 | 0.564 | 0.431 | 0.690 | 0.392 | 0.402 | 0.765 | 0.471  | 0.647 | 0.000 | 0.000 | 0.368 | 0.549 | 0.165 | 0.902 | 0.310 | 0.176 | 0.446  | 0.647 | 0.583 | 0.275 | 0.000 | 0.000 | 0.600 | 0.060 | 0.429 | 0.059 |       |
| yeast-1289vs7        | 0.500 | 0.233 | 0.462 | 0.200 | 0.375 | 0.100 | 0.115 | 0.367 | 0.233  | 0.333 | 0.000 | 0.000 | 0.151 | 0.433 | 0.025 | 0.467 | 0.417 | 0.167 | 0.200  | 0.433 | 0.000 | 0.000 | 0.000 | 0.000 | 0.000 | 0.000 | 0.000 | 0.053 | 0.033 |
| yeast-1vs7           | 0.132 | 0.500 | 0.533 | 0.267 | 0.545 | 0.200 | 0.205 | 0.533 | 0.341  | 0.467 | 0.000 | 0.000 | 0.225 | 0.300 | 0.073 | 0.600 | 0.667 | 0.133 | 0.304  | 0.567 | 0.000 | 0.000 | 0.000 | 0.000 | 1.000 | 0.033 | 0.000 | 0.000 |       |
| yeast-2vs4           | 0.588 | 0.922 | 0.771 | 0.725 | 0.755 | 0.725 | 0.523 | 0.882 | 0.662  | 0.843 | 0.000 | 0.000 | 0.581 | 0.843 | 0.136 | 0.647 | 0.826 | 0.745 | 0.661  | 0.804 | 0.771 | 0.529 | 0.000 | 0.000 | 0.800 | 0.160 | 0.605 | 0.510 |       |
| yeast-2vs8           | 0.917 | 0.550 | 0.900 | 0.450 | 0.000 | 0.000 | 0.400 | 0.700 | 0.500  | 0.550 | 0.579 | 0.550 | 0.625 | 0.750 | 0.074 | 0.800 | 0.917 | 0.550 | 0.355  | 0.550 | 0.000 | 0.000 | 0.917 | 0.550 | 0.917 | 0.550 | 0.500 | 0.100 |       |
| yeast1               | 0.573 | 0.569 | 0.533 | 0.457 | 0.653 | 0.513 | 0.557 | 0.613 | 0.561  | 0.655 | 0.501 | 0.587 | 0.423 | 0.800 | 0.405 | 0.760 | 0.631 | 0.462 | 0.469  | 0.704 | 0.652 | 0.175 | 0.345 | 0.774 | 0.553 | 0.061 | 0.000 | 0.000 |       |
| yeast3               | 0.526 | 0.920 | 0.707 | 0.638 | 0.740 | 0.767 | 0.651 | 0.926 | 0.691  | 0.798 | 0.525 | 0.890 | 0.646 | 0.883 | 0.178 | 0.914 | 0.810 | 0.730 | 0.619  | 0.847 | 0.651 | 0.436 | 0.500 | 0.006 | 0.476 | 0.123 | 0.700 | 0.816 |       |
| yeast4               | 0.168 | 0.824 | 0.571 | 0.255 | 0.706 | 0.255 | 0.232 | 0.686 | 0.308  | 0.471 | 0.170 | 0.765 | 0.210 | 0.510 | 0.060 | 0.863 | 0.224 | 0.294 | 0.253  | 0.451 | 0.000 | 0.000 | 0.000 | 0.000 | 0.000 | 0.000 | 0.000 | 0.000 | 0.000 |
| yeast5               | 0.460 | 0.909 | 0.775 | 0.705 | 0.780 | 0.727 | 0.518 | 1.000 | 0.603  | 0.864 | 0.308 | 1.000 | 0.574 | 0.886 | 0.055 | 0.886 | 0.481 | 0.864 | 0.630  | 0.773 | 0.200 | 0.023 | 0.000 | 0.000 | 0.000 | 0.000 | 0.000 | 0.000 | 0.000 |
| yeast6               | 0.153 | 0.857 | 0.581 | 0.514 | 0.720 | 0.514 | 0.275 | 0.714 | 0.386  | 0.629 | 0.164 | 0.857 | 0.280 | 0.657 | 0.030 | 0.600 | 0.263 | 0.714 | 0.352  | 0.543 | 0.000 | 0.000 | 0.000 | 0.000 | 0.000 | 0.000 | 0.483 | 0.400 |       |
| Mean                 | 0.589 | 0.831 | 0.745 | 0.673 | 0.744 | 0.635 | 0.588 | 0.812 | 0.648  | 0.788 | 0.544 | 0.662 | 0.602 | 0.798 | 0.326 | 0.829 | 0.651 | 0.667 | 0.628  | 0.755 | 0.506 | 0.360 | 0.403 | 0.306 | 0.579 | 0.289 | 0.539 | 0.524 |       |
| Std. Dev.            | 0.277 | 0.184 | 0.215 | 0.253 | 0.233 | 0.283 | 0.262 | 0.192 | 0.242  | 0.215 | 0.353 | 0.360 | 0.272 | 0.205 | 0.275 | 0.153 | 0.269 | 0.293 | 0.248  | 0.184 | 0.364 | 0.327 | 0.407 | 0.360 | 0.399 | 0.333 | 0.329 | 0.375 |       |

Table A6: Detailed test results for **CSR** vs. considered methods for *Precision* (in table denoted by **P**) and *Recall* (in table denoted by **R**) on medical datasets.

| Dataset               | CSR          |              | AB           |              | Bag          |              | SBag         |              | SBoost       |              | CSVM         |              | C45          |              | NN           |              | NB           |              | RIPPER       |              | 1R           |              | CFAR         |              | SGERD        |              | ART          |              |
|-----------------------|--------------|--------------|--------------|--------------|--------------|--------------|--------------|--------------|--------------|--------------|--------------|--------------|--------------|--------------|--------------|--------------|--------------|--------------|--------------|--------------|--------------|--------------|--------------|--------------|--------------|--------------|--------------|--------------|
|                       | P            | R            | P            | R            | P            | R            | P            | R            | P            | R            | P            | R            | P            | R            | P            | R            | P            | R            | P            | R            | P            | R            | P            | R            | P            | R            | P            | R            |
| breastcancer          | 0.434        | 0.659        | 0.280        | 0.247        | 0.500        | 0.212        | 0.455        | 0.471        | 0.391        | 0.400        | 0.315        | 0.365        | 0.541        | 0.800        | 0.397        | 0.659        | 0.576        | 0.447        | 0.405        | 0.553        | 0.349        | 0.176        | 0.000        | 0.000        | 0.706        | 0.312        | 0.000        | 0.000        |
| breast w/o consin     | 0.945        | 0.921        | 0.941        | 0.934        | 0.933        | 0.929        | 0.927        | 0.954        | 0.935        | 0.954        | 0.857        | 0.946        | 0.900        | 0.942        | 0.881        | 0.950        | 0.940        | 0.979        | 0.917        | 0.921        | 0.888        | 0.884        | 0.979        | 0.589        | 0.950        | 0.897        | 0.921        | 0.913        |
| diabetes              | 0.663        | 0.728        | 0.622        | 0.582        | 0.674        | 0.593        | 0.639        | 0.701        | 0.616        | 0.713        | 0.596        | 0.634        | 0.496        | 0.728        | 0.493        | 0.795        | 0.647        | 0.690        | 0.589        | 0.769        | 0.721        | 0.396        | 0.867        | 0.049        | 0.775        | 0.416        | 0.497        | 0.358        |
| hepatitis             | 0.592        | 0.906        | 0.676        | 0.719        | 0.692        | 0.563        | 0.480        | 0.750        | 0.656        | 0.656        | 0.403        | 0.331        | 0.533        | 0.781        | 0.563        | 0.844        | 0.649        | 0.750        | 0.468        | 0.688        | 0.643        | 0.281        | 0.708        | 0.531        | 0.733        | 0.423        | 0.690        | 0.625        |
| indian liver          | 0.457        | 0.766        | 0.455        | 0.365        | 0.468        | 0.347        | 0.464        | 0.766        | 0.482        | 0.737        | 0.414        | 0.114        | 0.510        | 0.838        | 0.431        | 0.760        | 0.471        | 0.737        | 0.425        | 0.826        | 1.000        | 0.036        | 0.000        | 0.000        | 0.217        | 0.032        | 0.000        | 0.000        |
| liver disorders       | 0.523        | 0.552        | 0.533        | 0.503        | 0.541        | 0.414        | 0.476        | 0.538        | 0.495        | 0.628        | 0.465        | 0.676        | 0.462        | 0.683        | 0.405        | 0.572        | 0.530        | 0.490        | 0.491        | 0.586        | 0.598        | 0.421        | 0.438        | 0.952        | 0.532        | 0.283        | 0.000        | 0.000        |
| postoperative patient | 0.429        | 0.250        | 0.167        | 0.083        | 0.167        | 0.042        | 0.256        | 0.458        | 0.128        | 0.208        | 0.175        | 0.042        | 0.688        | 0.458        | 0.237        | 0.583        | 0.333        | 0.083        | 0.411        | 0.910        | 0.743        | 0.452        | 0.424        | 0.912        | 0.719        | 0.531        | 0.000        | 0.000        |
| onko                  | 0.745        | 0.512        | 0.697        | 0.485        | 0.732        | 0.479        | 0.668        | 0.556        | 0.644        | 0.605        | 0.588        | 0.559        | 0.479        | 0.644        | 0.582        | 0.619        | 0.712        | 0.529        | 0.220        | 0.375        | 0.000        | 0.000        | 0.000        | 0.000        | 0.200        | 0.048        | 0.000        | 0.000        |
| Mean                  | <b>0.598</b> | <b>0.662</b> | <b>0.546</b> | <b>0.490</b> | <b>0.588</b> | <b>0.447</b> | <b>0.546</b> | <b>0.649</b> | <b>0.543</b> | <b>0.613</b> | <b>0.477</b> | <b>0.483</b> | <b>0.526</b> | <b>0.734</b> | <b>0.499</b> | <b>0.723</b> | <b>0.607</b> | <b>0.588</b> | <b>0.491</b> | <b>0.703</b> | <b>0.618</b> | <b>0.331</b> | <b>0.427</b> | <b>0.379</b> | <b>0.604</b> | <b>0.368</b> | <b>0.263</b> | <b>0.237</b> |
| Std. Dev.             | 0.180        | 0.222        | 0.246        | 0.267        | 0.227        | 0.267        | 0.199        | 0.173        | 0.234        | 0.225        | 0.206        | 0.299        | 0.070        | 0.145        | 0.189        | 0.136        | 0.180        | 0.267        | 0.201        | 0.190        | 0.316        | 0.282        | 0.401        | 0.417        | 0.269        | 0.277        | 0.381        | 0.339        |

Table A7: Detailed results for **CSR** and methods considered in the experiments for average execution time of five folds (expressed in miliseconds). We have used the KEEL implementation of methods to estimate the time.

| Dataset                | CSR         | AB          | BAG         | SBAG        | SBoost      | CSVM        | C45        | NN         | NB         | RIPPER      | IR          | CFAR        | SGERD      | ART        |
|------------------------|-------------|-------------|-------------|-------------|-------------|-------------|------------|------------|------------|-------------|-------------|-------------|------------|------------|
| abalone19              | 8960        | 10272       | 9076        | 29950       | 63957       | 5004        | 987        | 720        | 804        | 5273        | 3669        | 9641        | 1348       | 1085       |
| abalone9-18            | 2574        | 2311        | 2168        | 4658        | 7626        | 1939        | 448        | 469        | 177        | 1856        | 496         | 4870        | 424        | 630        |
| car-2class             | 2006        | 2812        | 2804        | 6208        | 12233       | 1971        | 477        | 823        | 303        | 2253        | 724         | 992         | 503        | 961        |
| ecoli-0-1-3-7vs2-6     | 847         | 413         | 768         | 1192        | 1307        | 939         | 212        | 477        | 88         | 181         | 156         | 793         | 196        | 146        |
| ecoli-0vs1             | 644         | 496         | 722         | 1762        | 2629        | 690         | 109        | 384        | 92         | 237         | 196         | 1813        | 402        | 221        |
| ecoli1                 | 976         | 1144        | 1103        | 2731        | 2675        | 757         | 130        | 370        | 92         | 415         | 197         | 1048        | 452        | 240        |
| ecoli2                 | 1041        | 975         | 926         | 2442        | 3269        | 782         | 167        | 385        | 95         | 296         | 187         | 1984        | 278        | 194        |
| ecoli3                 | 1122        | 921         | 927         | 1955        | 3044        | 698         | 138        | 362        | 97         | 281         | 222         | 1142        | 231        | 412        |
| ecoli4                 | 1087        | 753         | 876         | 2058        | 2976        | 700         | 145        | 366        | 98         | 574         | 951         | 26093       | 1067       | 668        |
| glass-0123vs456        | 696         | 862         | 869         | 1315        | 1927        | 929         | 271        | 621        | 76         | 434         | 212         | 4674        | 212        | 169        |
| glass-016vs5           | 745         | 345         | 711         | 1566        | 2114        | 689         | 104        | 408        | 84         | 281         | 178         | 3541        | 174        | 141        |
| glass0                 | 657         | 985         | 1044        | 1455        | 2713        | 805         | 168        | 415        | 78         | 340         | 247         | 3769        | 259        | 278        |
| glass1                 | 779         | 1060        | 1034        | 1336        | 1899        | 1307        | 375        | 727        | 82         | 605         | 437         | 5582        | 440        | 433        |
| glass4                 | 813         | 467         | 827         | 1647        | 2378        | 765         | 118        | 345        | 90         | 218         | 178         | 1098        | 209        | 206        |
| glass5                 | 810         | 450         | 824         | 1635        | 2380        | 796         | 115        | 399        | 81         | 228         | 194         | 4783        | 187        | 134        |
| glass6                 | 894         | 799         | 1207        | 2371        | 4841        | 775         | 135        | 399        | 85         | 203         | 206         | 9965        | 228        | 137        |
| haberman1mb            | 469         | 385         | 670         | 1135        | 1539        | 568         | 112        | 356        | 72         | 387         | 125         | 172         | 156        | 119        |
| iris0                  | 419         | 114         | 354         | 608         | 1002        | 403         | 59         | 384        | 39         | 84          | 103         | 284         | 169        | 94         |
| new-thyroid1           | 457         | 522         | 597         | 1319        | 1790        | 488         | 87         | 377        | 61         | 143         | 137         | 836         | 200        | 115        |
| new-thyroid2           | 456         | 389         | 634         | 2583        | 3740        | 484         | 104        | 338        | 74         | 178         | 131         | 440         | 212        | 122        |
| page-blocks13vs4       | 1415        | 739         | 1353        | 2850        | 4325        | 1062        | 268        | 519        | 220        | 19354       | 58740       | 28367       | 2914       | 3841       |
| page-blocks0           | 9605        | 27315       | 30519       | 46360       | 110148      | 5765        | 4191       | 800        | 1147       | 393         | 424         | 6558        | 303        | 293        |
| pima1mb                | 1618        | 2594        | 2659        | 3833        | 5739        | 2232        | 527        | 487        | 301        | 1354        | 546         | 1472        | 640        | 733        |
| shuttle-c0-vs-c4       | 2686        | 867         | 3721        | 8880        | 16808       | 2234        | 516        | 388        | 416        | 446         | 209         | 1332        | 315        | 346        |
| shuttle-c2-vs-c4       | 628         | 126         | 467         | 903         | 1159        | 493         | 73         | 408        | 66         | 137         | 119         | 8602        | 150        | 109        |
| vowel0                 | 58700       | 859         | 3783        | 7804        | 12128       | 1769        | 523        | 672        | 274        | 1516        | 1904        | 6848        | 590        | 652        |
| wisconsin1mb           | 2480        | 2008        | 2096        | 8541        | 12072       | 1669        | 729        | 793        | 167        | 587         | 415         | 3572        | 870        | 412        |
| yeast-05679vs4         | 2358        | 1516        | 1512        | 3179        | 4758        | 1169        | 287        | 408        | 183        | 630         | 483         | 3947        | 378        | 418        |
| yeast-1289vs7          | 1201        | 1324        | 1258        | 2797        | 4380        | 1097        | 223        | 398        | 121        | 961         | 399         | 3304        | 450        | 671        |
| yeast-1vs7             | 3428        | 2790        | 2442        | 6353        | 10503       | 2093        | 489        | 521        | 205        | 200         | 197         | 4855        | 193        | 203        |
| yeast-2vs4             | 2318        | 1422        | 1764        | 3073        | 7047        | 1172        | 306        | 609        | 182        | 699         | 381         | 5576        | 484        | 293        |
| yeast-2vs8             | 1799        | 1333        | 1377        | 2935        | 4705        | 908         | 235        | 402        | 130        | 477         | 234         | 2487        | 287        | 268        |
| yeast1                 | 4063        | 4689        | 5079        | 7736        | 14785       | 2402        | 539        | 680        | 256        | 3017        | 749         | 3170        | 615        | 1485       |
| yeast3                 | 4890        | 4554        | 3991        | 9486        | 15083       | 2295        | 495        | 655        | 430        | 1261        | 742         | 5725        | 543        | 668        |
| yeast4                 | 4523        | 4125        | 3550        | 9005        | 14825       | 1679        | 478        | 682        | 318        | 2306        | 686         | 3922        | 518        | 814        |
| yeast5                 | 4482        | 3550        | 3199        | 8204        | 13477       | 1637        | 465        | 644        | 299        | 746         | 708         | 3750        | 543        | 711        |
| yeast6                 | 4422        | 3744        | 3448        | 8667        | 14708       | 1726        | 494        | 656        | 303        | 849         | 680         | 3934        | 521        | 730        |
| breastcancer           | 2206        | 1041        | 1010        | 1554        | 2224        | 1635        | 173        | 383        | 284        | 525         | 244         | 702         | 218        | 721        |
| breast-wisconsin       | 4448        | 1457        | 1547        | 2476        | 4526        | 4958        | 304        | 652        | 345        | 721         | 449         | 4509        | 471        | 474        |
| diabetes               | 4084        | 1597        | 1628        | 2523        | 4651        | 5045        | 339        | 459        | 451        | 1875        | 365         | 1345        | 471        | 1023       |
| hepatitis              | 1347        | 399         | 618         | 941         | 1262        | 725         | 93         | 246        | 103        | 200         | 125         | 7891        | 153        | 319        |
| indian liver           | 4041        | 1176        | 1222        | 2139        | 3484        | 3372        | 303        | 431        | 252        | 1323        | 249         | 7064        | 699        | 3834       |
| liver disorders        | 834         | 756         | 909         | 1180        | 1697        | 1309        | 144        | 615        | 144        | 574         | 178         | 184         | 312        | 209        |
| post-operative patient | 673         | 403         | 443         | 659         | 797         | 600         | 66         | 386        | 78         | 300         | 100         | 643         | 162        | 290        |
| oncology               | 1672        | 1083        | 1145        | 2372        | 4372        | 2393        | 277        | 858        | 253        | 4153        | 253         | 534         | 478        | 430        |
| <b>Mean</b>            | <b>3475</b> | <b>2181</b> | <b>2420</b> | <b>4986</b> | <b>9242</b> | <b>1625</b> | <b>380</b> | <b>522</b> | <b>214</b> | <b>1313</b> | <b>1745</b> | <b>4529</b> | <b>458</b> | <b>588</b> |
